# Supplementary material for: Electrosynthesis of amino acids from biomass-derivable acids on titanium dioxide
Source: Royal Society of Chemistry journal article supplement (doi:10.1039/c9cc07208j), 2019-01-01
Supplement: c9cc07208j1.pdf [file c9cc07208j1.pdf]

Supporting Information

Electrosynthesis of Amino Acids from Biomass-Derivable Acids on Titanium Dioxide

Takashi Fukushima <sup>a</sup> and Miho Yamauchi <sup>\*a,b</sup>

E-mail: yamauchi@i2cner.kyushu-u.ac.jp

<sup>a</sup> *International Institute for Carbon-Neutral Energy Research (WPI-I<sup>2</sup>CNER), Kyushu University  
Motooka 744, Nishi-ku, Fukuoka 819-0395, Japan.*

<sup>b</sup> *Department of Chemistry, Faculty of Science, Kyushu University  
Motooka 744, Nishi-ku, Fukuoka 819-0395, Japan.*

## Table of Contents

|                                                                                                                                                 |    |
|-------------------------------------------------------------------------------------------------------------------------------------------------|----|
| 1. Materials and Methods.....                                                                                                                   | 3  |
| 1-1. Materials.....                                                                                                                             | 3  |
| 1-2. Spectroscopic measurements.....                                                                                                            | 3  |
| 1-3. Preparation of Timesh and Ti felt covered with anatase-TiO <sub>2</sub> layer (TiO <sub>2</sub> /Timesh and TiO <sub>2</sub> /Ti felt) ... | 3  |
| 1-4. Preparation of IrO <sub>2</sub> nanoparticles.....                                                                                         | 4  |
| 1-5. Electrochemical studies with typical glass cells.....                                                                                      | 4  |
| 1-5-1. Cyclic voltammetry (CV) measurements.....                                                                                                | 4  |
| 1-5-2. Chronoamperometry (CA) experiments.....                                                                                                  | 5  |
| 1-6. Electrosynthesis of alanine using the AAEC.....                                                                                            | 6  |
| 1-6-1. Preparation of the membrane electrode assembly (MEA) .....                                                                               | 6  |
| 1-6-2. Fabrication of the AAEC.....                                                                                                             | 7  |
| 1-6-3. Operation of the AAEC.....                                                                                                               | 7  |
| Fig. S1.....                                                                                                                                    | 7  |
| Fig. S2.....                                                                                                                                    | 9  |
| Fig. S3.....                                                                                                                                    | 10 |
| Fig. S4.....                                                                                                                                    | 11 |
| Fig. S5.....                                                                                                                                    | 12 |
| Fig. S6.....                                                                                                                                    | 13 |
| Table S1.....                                                                                                                                   | 14 |
| Table S2.....                                                                                                                                   | 15 |
| Table S3.....                                                                                                                                   | 16 |
| Table S4.....                                                                                                                                   | 17 |
| NMR data for determination of amino acids.....                                                                                                  | 18 |
| References.....                                                                                                                                 | 25 |

## 1. Materials and Methods

### 1-1. Materials

Pyruvic acid, glyoxylic acid,  $\alpha$ -ketoglutaric acid, 4-methyl-2-oxovaleric acid, phenylpyruvic acid, 4-hydroxyphenylpyruvic acid, and hydroxylamine sulfate were purchased from Tokyo Chemical Industry Co., Ltd. (TCI).  $\text{H}_2\text{IrCl}_6 \cdot n\text{H}_2\text{O}$ ,  $\text{Na}_2\text{SO}_4$ ,  $\text{NaOH}$ , 28%  $\text{NH}_3$  aqueous solution, and  $(\text{NH}_4)_2\text{SO}_4$  were purchased from FUJIFILM Wako Pure Chemical Corporation. Ti mesh (100 mesh) and Ti felt (WB/Ti/20/150,  $150 \text{ g m}^{-2}$ ) were purchased from Manabe Industry Co., Ltd and NIKKO TECHNO, Ltd., respectively. Ti paper, WEBTi-K (0.025 mm thickness), was purchased from Toho Technical Service, Co., Ltd. Nafion NRE-212, Nafion 117 membranes, and Nafion solution (5 wt%) were purchased from Sigma-Aldrich Co. Lab-designed Ti current collectors with flow channels ( $4 \text{ cm}^2$ , serpentine flow) were used for the polymer electrolyte amino acid electrosynthesis cell (AAEC). All chemicals were used without further purification.

### 1-2. Spectroscopic measurements

$^1\text{H}$  NMR spectra were recorded on a Bruker Avance III (600 MHz) spectrometer at  $25^\circ\text{C}$ . The obtained spectra were analyzed by using JEOL Delta NMR Processing and Control Software v5.3. The  $^1\text{H}$  NMR chemical shifts were reported to be  $\delta$  values (ppm) relative to methyl proton of 4,4-dimethyl-4-silapentane-1-sulfonic acid.

### 1-3. Preparation of Ti mesh and Ti felt covered with anatase- $\text{TiO}_2$ layer ( $\text{TiO}_2/\text{Ti}$ mesh and $\text{TiO}_2/\text{Ti}$ felt)

$\text{TiO}_2/\text{Ti}$  mesh and  $\text{TiO}_2/\text{Ti}$  felt ( $2.5 \times 2 \text{ cm}^2$ ) were prepared from Ti mesh and Ti felt, respectively, through a two-step hydrothermal reaction that we reported previously <sup>1</sup>. A Ti substrate, i.e., Ti mesh or Ti felt, was cut into  $2.5 \times 2 \text{ cm}^2$  pieces, washed with hexane and ethanol and dried in air. Subsequently, 3 pieces of Ti substrate were placed into a 50 mL Teflon-lined autoclave filled with 30 mL of 1 M  $\text{NaOH}$  aq. The autoclave was then sealed and heated at  $220^\circ\text{C}$  for 12 h. After cooling to room temperature, the Ti substrate covered with sodium titanate was removed from the autoclave and immersed in 0.1 M  $\text{HCl}$  aq. for 10 min to replace  $\text{Na}^+$  with  $\text{H}^+$ . Then, the mesh was washed with water and ethanol and dried in air. After that, the 3 pieces of titanate covered Ti substrate was placed in a 50 mL Teflon-lined autoclave containing 40 mL of water. The autoclave was then sealed and heated at  $200^\circ\text{C}$  for 24 h. After

cooling to room temperature, the TiO<sub>2</sub>/Ti substrate was removed from the autoclave, washed with water and ethanol and dried in air.

#### 1-4. Preparation of IrO<sub>2</sub> nanoparticles

Nanosized IrO<sub>2</sub> particles for the anode catalyst of the AAEC were prepared from H<sub>2</sub>IrCl<sub>6</sub>•nH<sub>2</sub>O as the starting material according to a reported procedure <sup>2, 3</sup>. An aqueous solution containing H<sub>2</sub>IrCl<sub>6</sub>•nH<sub>2</sub>O (97.0 mM, 200 mL) was stirred for 45 min. at 100 °C. An aqueous solution of NaOH (1 M, 200 mL) was added to promote the formation of Ir-hydroxide, and the solution was stirred for another 45 min. at 100 °C. Afterwards, the solution was centrifuged for 15 min and filtered. The prepared nonstoichiometric hydroxide (Ir(OH)<sub>x</sub>) was dried for 5 h at 80 °C and calcined in air at 400 °C for 1 h. to obtain IrO<sub>2</sub> powder.

#### 1-5. Electrochemical studies with typical glass cells

Electrochemical experiments were conducted using a 3-electrode system connected to a VersaSTAT 4 potentiostat (Princeton Applied Research). TiO<sub>2</sub>/Ti mesh, a coiled Pt wire (length of 230 mm, diameter of 0.5 mm, BAS Inc.) and an Ag/AgCl reference electrode (3 M NaCl, RE-1B, BAS Inc.) were used as a working electrode, counter electrode and reference electrode, respectively. Potentials applied to the working electrode were measured against a reference electrode and converted to the reversible hydrogen electrode (RHE) reference scale using:

$$E \text{ (vs RHE)} = E \text{ (vs Ag/AgCl)} + 0.196 \text{ V} + 0.059 \text{ V} \times \text{pH} \quad (1)$$

##### 1-5-1. Cyclic voltammetry (CV) measurements

CV measurements were conducted in a glass three-electrode electrochemical cell (100 mL in volume) sealed to be gas-tight with Teflon caps. An aqueous electrolyte aqueous solution (40 mL) was introduced into the glass cell. After the glass cell was tightly sealed with a Teflon cap, Ar gas was bubbled through the solution for 30 min. in order to purge the air from the inside of the cell. The current value was recorded against the applied potential at a scan rate of 10 mV/s with 3 scan cycles. A 1.5 M NH<sub>3</sub>/(NH<sub>4</sub>)<sub>2</sub>SO<sub>4</sub> buffer containing 30 mM pyruvic acid (pH 10) was used as the electrolyte solution for CV measurements in the presence of NH<sub>3</sub>. This electrolyte solution was prepared by mixing 1.5 M NH<sub>3</sub> (aq.) containing 30 mM pyruvic acid and 0.75 M (NH<sub>4</sub>)<sub>2</sub>SO<sub>4</sub> aq. containing 30 mM pyruvic acid to adjust the pH to 10. For CV measurements in the presence of NH<sub>2</sub>OH, 0.2 M H<sub>2</sub>SO<sub>4</sub> (aq.) containing 160 mM pyruvic acid and 80 mM (NH<sub>2</sub>OH)<sub>2</sub>•H<sub>2</sub>SO<sub>4</sub> (pH 0.53) was used as the electrolyte solution for CV

measurements in the presence of  $\text{NH}_2\text{OH}$ . In both cases (employing  $\text{NH}_3$  and  $\text{NH}_2\text{OH}$ ), blank CV measurements were conducted with the electrolyte solution without pyruvic acid.

### 1-5-2. Chronoamperometry (CA) experiments

The electrosynthesis of amino acids at a constant potential, i.e., CA, was performed in a two-compartment electrochemical cell sealed to be gas-tight with Teflon caps. A piece of proton-conducting membrane (Nafion NRE-212) was used as a separator. A typical procedure is as follows. A 6.0 M  $\text{NH}_3/(\text{NH}_4)_2\text{SO}_4$  buffer containing 160 mM pyruvic acid (pH 10, 35 mL) was introduced into a cathodic cell (75 mL in volume) into which the working and reference electrode were subsequently immersed. A counter electrode was placed in an anodic cell (75 mL in volume) containing a 6.0 M  $\text{NH}_3/(\text{NH}_4)_2\text{SO}_4$  buffer (pH 10, 35 mL). After the Teflon caps were tightly closed, Ar gas was bubbled through both the cathodic and anodic cells for 30 min. to purge the air from the cells. The electrosynthesis of alanine was conducted at  $-0.32$  V vs RHE and  $40^\circ\text{C}$  for 2 h, during which the potential was controlled using a VersaSTAT 4 potentiostat. The reaction solution collected from the cathodic cell was analyzed using a high-performance liquid chromatograph (HPLC, Prominence, Shimadzu) system equipped with a refractive index detector (RID-10A, Shimadzu).  $\alpha$ -Keto acids and  $\alpha$ -hydroxyl acids were quantified on a Shodex KC-811 column using a 50 mM  $\text{HClO}_4$  (aq.) as the mobile phase. The reaction solution was also analyzed by  $^1\text{H}$  NMR spectroscopy (Avance III, Bruker). A  $^1\text{H}$  NMR spectrum of the reaction solution diluted 5 times with  $\text{D}_2\text{O}$  was measured, and amino acids were quantified by the signal appearing in the area of approximately 3.4 – 3.8 ppm assignable to the proton on the  $\alpha$ -carbon of the amino acids.

$\text{NH}_3/(\text{NH}_4)_2\text{SO}_4$  buffers with and without  $\alpha$ -keto acids were used as the cathodic and anodic electrolyte solutions, respectively, for the electrosynthesis of amino acids employing  $\text{NH}_3$  as the nitrogen source. A  $\text{H}_2\text{SO}_4$  (aq.) containing  $\alpha$ -keto acids and  $(\text{NH}_2\text{OH})_2\cdot\text{H}_2\text{SO}_4$  and a  $\text{H}_2\text{SO}_4$  (aq.) were used as cathodic and anodic electrolyte solutions, respectively, for the electrosynthesis of amino acids employing  $\text{NH}_2\text{OH}$  as a nitrogen source. The electrolyte solution with a pH of 1.2 – 9 was prepared with 0.2 M  $\text{Na}_2\text{SO}_4$  as the supporting electrolyte instead of  $\text{H}_2\text{SO}_4$  and the pH of the solution was adjusted by adding aqueous  $\text{H}_2\text{SO}_4$  or  $\text{NaOH}$ .

The Faradaic efficiency (FE) for each product was determined as follows:

$$\text{Faradaic efficiency} = \frac{n \times m_{\text{products}} \times F}{Q} \times 100 \quad (2)$$

where  $n$  represents the number of electrons required for the formation of products via  $\alpha$ -keto acid reduction ( $n = 2$  for the formation of amino acids and  $\alpha$ -hydroxy acids in the presence of  $\text{NH}_3$ ,  $n = 4$  for formation of amino acids in the presence of  $\text{NH}_2\text{OH}$ );  $m_{\text{products}}$  is the moles of products;  $F$  is the Faraday constant ( $96,485 \text{ C mol}^{-1}$ ); and  $Q$  is the total charge (in Coulombs) passed across the electrode during the electroreduction.

## **1-6. Electrosynthesis of alanine using the AAEC**

### **1-6-1. Preparation of the membrane electrode assembly (MEA)**

A MEA composed of a Nafion 117 membrane, an  $\text{IrO}_2$  anode catalyst layer, and a porous Ti paper was prepared as follows.  $\text{IrO}_2$  was deposited on the Nafion membrane using the airbrush technique <sup>4,5</sup>. Catalyst ink containing 12 mg of  $\text{IrO}_2$  powder, 62  $\mu\text{L}$  of Nafion solution (5 wt%), 50  $\mu\text{L}$  of 2-propanol and 50  $\mu\text{L}$  of water was dispersed on the Nafion membrane ( $\text{IrO}_2$ : 3  $\text{mg cm}^{-2}$ ) using an airbrush and naturally dried in the atmosphere. Ti paper ( $2 \times 2 \text{ cm}^2$ ) was placed on the deposited  $\text{IrO}_2$  layer on the Nafion membrane. Then, the Nafion membrane with the  $\text{IrO}_2$  layer and the Ti paper was inserted into a hot press machine (H400-15, AS ONE Corporation) and pressed at 120  $^\circ\text{C}$  for 4 minutes. After cooling to room temperature, the MEA was extracted from the press machine.

### 1-6-2. Fabrication of the AAEC

Fig. S1 illustrates a schematic view of the AAEC equipped with a  $\text{TiO}_2/\text{Ti}$  felt cathode and the prepared MEA between two current collectors having sample flow channels. Lab-made titanium blocks having serpentine flow patterns were utilized as current collectors (reaction area is  $4\text{ cm}^2$ ). The MEA and  $\text{TiO}_2/\text{Ti}$  felt were placed between the current collectors. Silicon rubber was used as a gasket. These components were stacked and fastened with nuts and bolts.

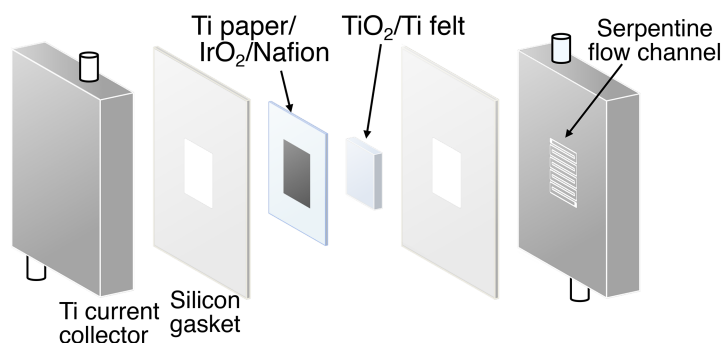

**Fig. S1** A schematic view of the AAEC.

### 1-6-3. Operation of the AAEC

An aqueous solution containing 160 mM pyruvic acid, 96 mM  $(\text{NH}_2\text{OH})\cdot\text{H}_2\text{SO}_4$ , and 0.2 M  $\text{H}_2\text{SO}_4$  (pH 0.53) and a deionized water were used as the reaction solutions for the cathode and anode, respectively. To avoid the influence of the  $\text{O}_2$  reduction reaction during the electrolysis, the solution was bubbled once with argon and degassed using a degasser (Gastorr BG-34, FLOM Co.) before being flowed into the AAEC. The reaction solution was introduced using a flow controller (PCS Pump SP-21, FLOM Co.) on the cathode and anode side at low rates of  $1.0$  and  $0.5\text{ mL min}^{-1}$ , respectively. The operation temperature of the AAEC was kept at  $25^\circ\text{C}$ .

The reduction current was monitored under the application of a constant voltage in the range from 2.2 to 2.8 V between the electrodes using a potentiogalvanostat (1280 C, Solartron). After waiting for 3 min to reach a steady state, the solution from the cathode outlet was collected for 116 min under each applied voltage. The collected solution was analyzed using an HPLC system (Prominence, Shimadzu) equipped with a refractive index detector (RID-10A, Shimadzu). Pyruvic oxime was quantified on a Shodex KC-811 column using a 50 mM  $\text{HClO}_4$  (aq.) as the mobile phase. The collected solution was also analyzed by  $^1\text{H}$  NMR spectroscopy (Avance III, Bruker). A  $^1\text{H}$  NMR spectrum of the collected solution diluted 5 times with  $\text{D}_2\text{O}$  was measured, and alanine was quantified by the signal appearing in the area of approximately

4.4 ppm assignable to the proton on the  $\alpha$ -carbon of alanine. The FE for alanine production was determined with equation (2) as mentioned above.



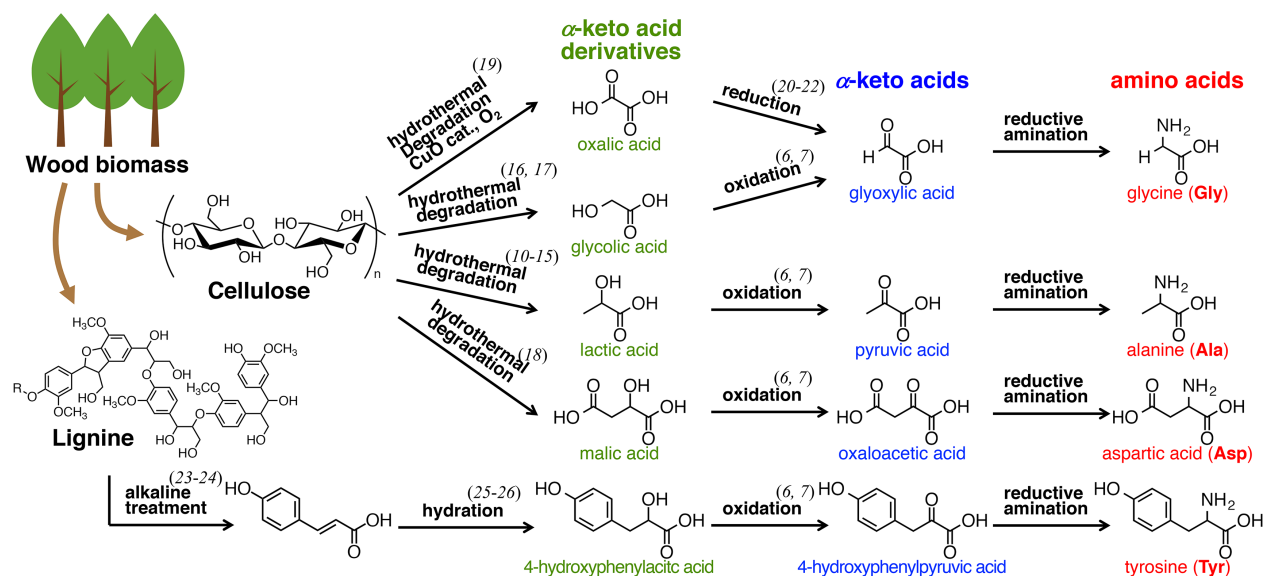

**Fig. S2** Possible routes for the preparation of  $\alpha$ -keto acids from wood biomass. Representative references<sup>6-26</sup> for the each chemical process are given in the figure. Amino acids that can be synthesized from the  $\alpha$ -keto acids by reductive amination reaction are also provided in the figure.

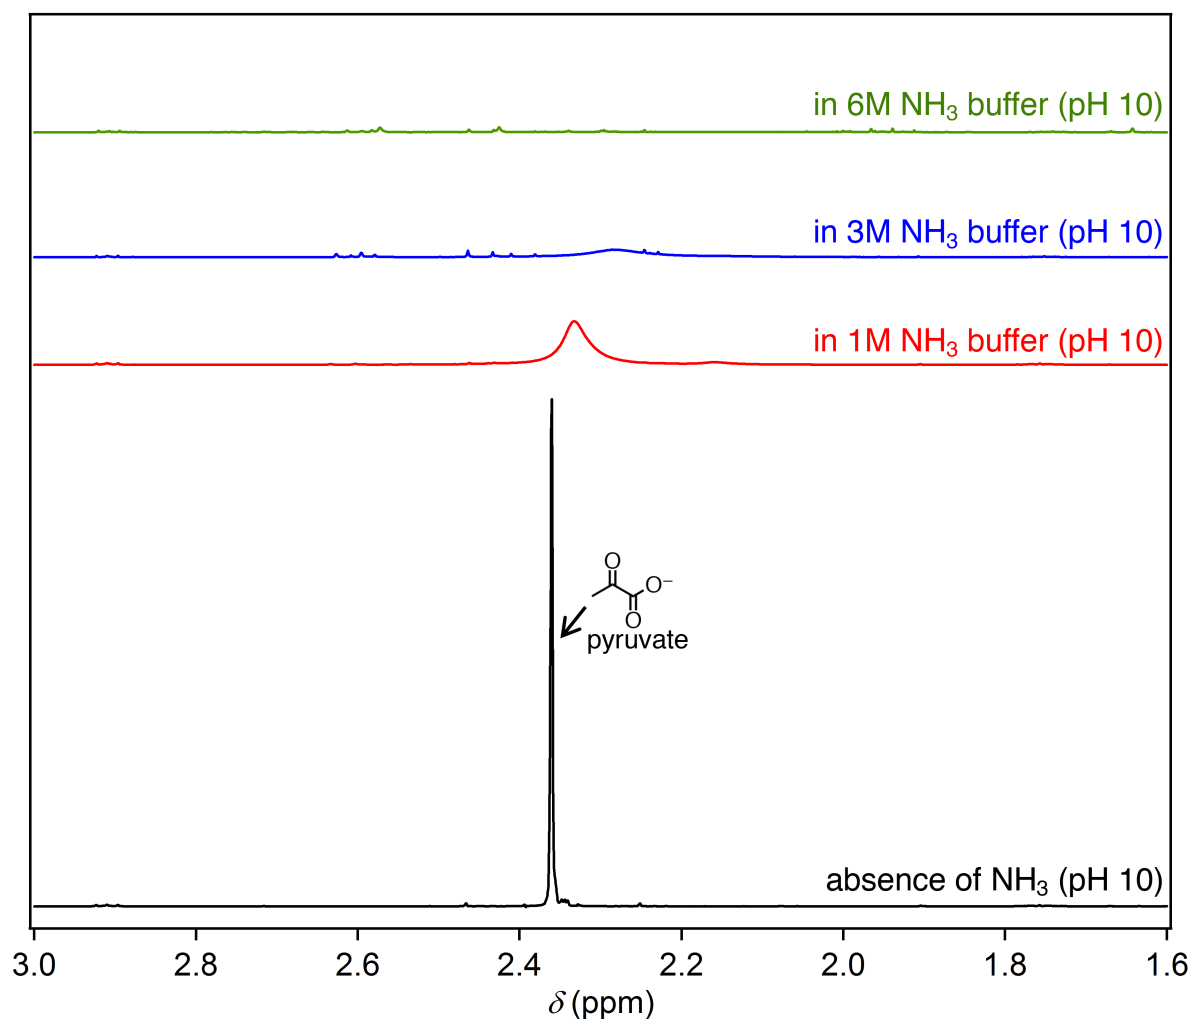

**Fig. S3**  $^1\text{H}$  NMR spectra for 160 mM pyruvic acid in (black line)  $\text{D}_2\text{O}$ , and in  $\text{D}_2\text{O}$  buffered with (red line) 1 M, (blue line) 3 M, and (green line) 6 M  $\text{NH}_3/(\text{NH}_4)_2\text{SO}_4$ . The signal at 2.3 ppm assignable to methyl proton of pyruvate becomes broader with increasing  $\text{NH}_3$  concentration. Even in 6 M  $\text{NH}_3$  buffer, no distinguishable signal is observed around 2.1 ppm where the signal attributable to methyl proton of pyruvate imine is expected to appear.

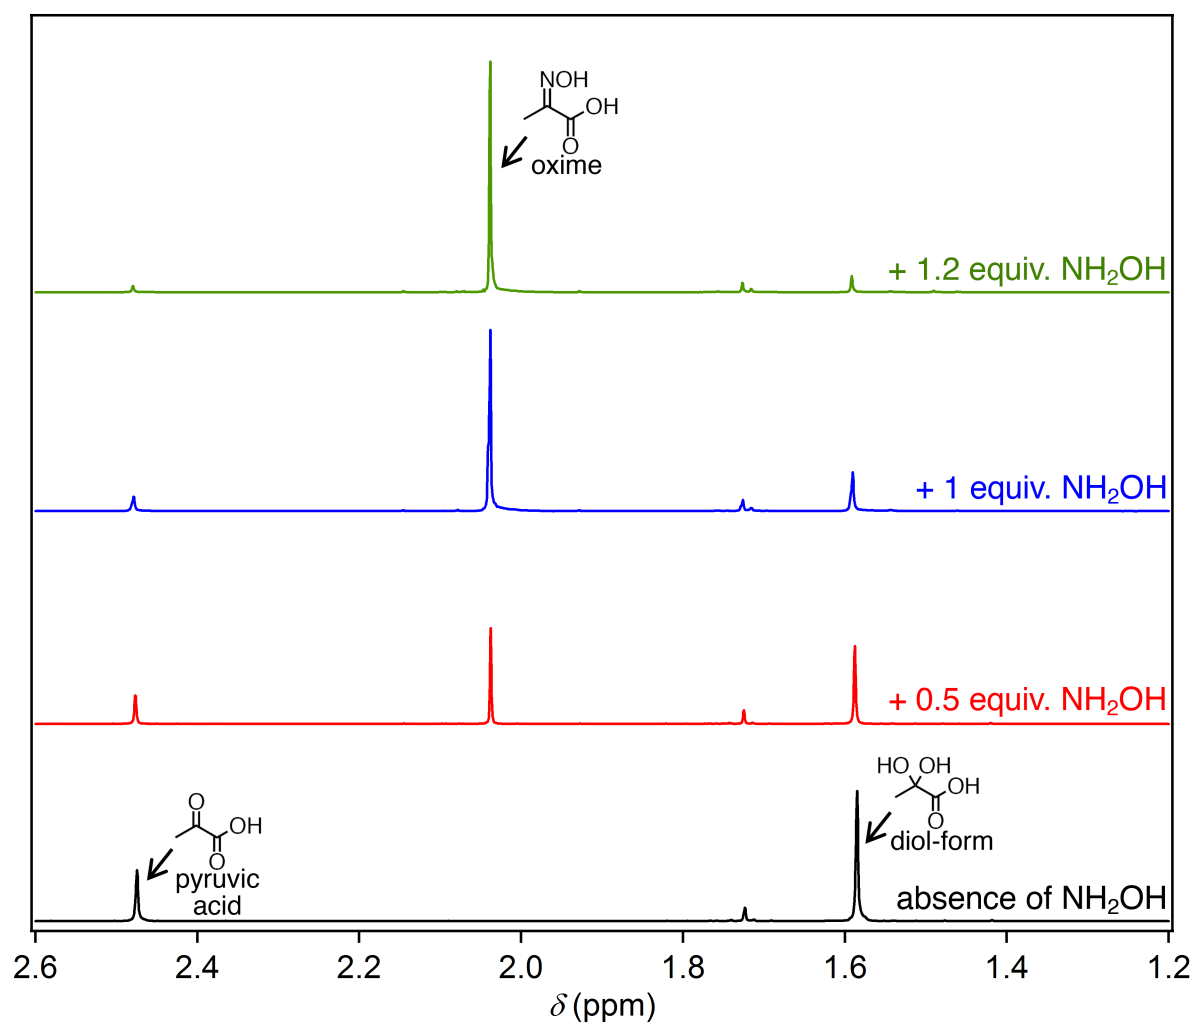

**Fig. S4**  $^1\text{H}$  NMR spectra for 160 mM pyruvic acid with (red line) 40 mM, (blue line) 80 mM, and (green line) 96 mM  $(\text{NH}_2\text{OH})_2 \cdot \text{H}_2\text{SO}_4$  and (black line) without  $(\text{NH}_2\text{OH})_2 \cdot \text{H}_2\text{SO}_4$  in 0.5 M  $\text{H}_2\text{SO}_4$   $\text{D}_2\text{O}$  solution. The signals at 2.5 and 1.6 ppm assignable to pyruvic acid and its hydrated diol-form, respectively, decrease with increasing  $\text{NH}_2\text{OH}$  concentration, and almost disappear in the presence of 1.2 equivalent of  $\text{NH}_2\text{OH}$ .

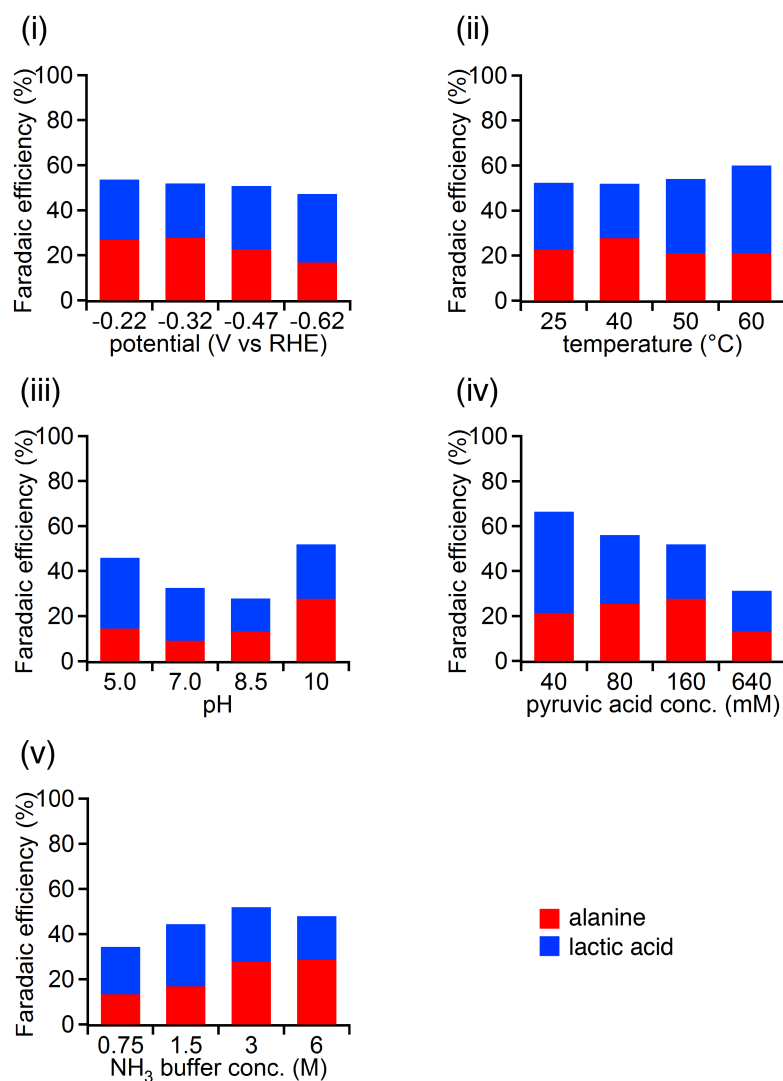

**Fig. S5** FEs for alanine (red bar) and lactic acid (blue bar) productions in the presence of NH<sub>3</sub> at various (i) applied potentials, (ii) temperatures, (iii) pH values, (iv) pyruvic acid concentrations, and (v) NH<sub>3</sub> buffer concentrations. Detailed conditions for each electrochemical run are summarized in Table S1.

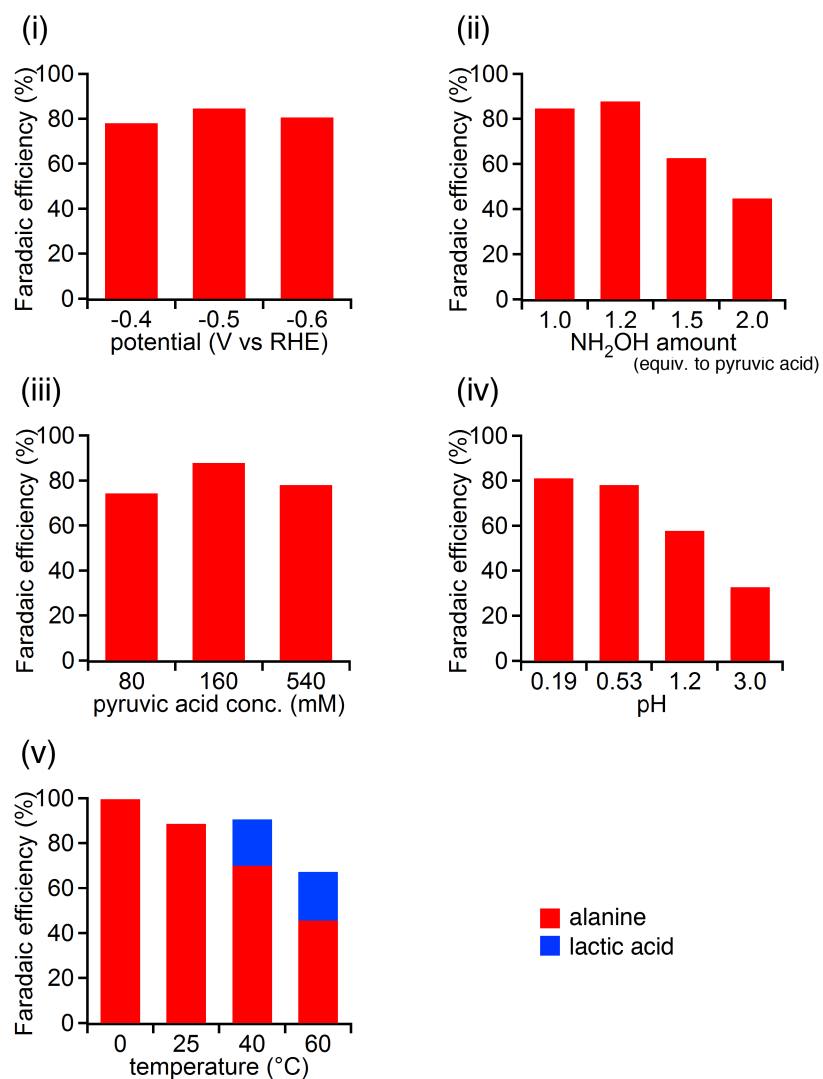

**Fig. S6** FEs for alanine (red bar) and lactic acid (blue bar) production in the presence of  $\text{NH}_2\text{OH}$  at various (i) applied potentials, (ii)  $\text{NH}_2\text{OH}$  amounts, (iii) pyruvic acid concentrations, (iv) pH values, and (v) temperatures. Detailed conditions for each electrochemical run are summarized in Table S2.

**Table S1** Electrochemical reduction of pyruvic acid under various (i) potentials, (ii) temperatures, (iii) pH values, (iv) pyruvic acid concentrations, and (v) NH<sub>3</sub> buffer concentrations.

| Reaction conditions |                                    |               |            |                            |                                     | FE (%) for products |             |
|---------------------|------------------------------------|---------------|------------|----------------------------|-------------------------------------|---------------------|-------------|
|                     | Potential<br>(V <sub>vs</sub> RHE) | Temp.<br>(C°) | pH         | Pyruvic acid<br>conc. (mM) | NH <sub>3</sub> buffer<br>conc. (M) | Alanine             | Lactic acid |
| (i)                 | <b>-0.22</b>                       | 40            | 10         | 160                        | 3.0                                 | 26.8                | 26.8        |
| (i)                 | <b>-0.32</b>                       | 40            | 10         | 160                        | 3.0                                 | 27.7                | 24.2        |
| (i)                 | <b>-0.47</b>                       | 40            | 10         | 160                        | 3.0                                 | 22.7                | 28.1        |
| (i)                 | <b>-0.62</b>                       | 40            | 10         | 160                        | 3.0                                 | 16.8                | 30.5        |
| (ii)                | -0.32                              | <b>25</b>     | 10         | 160                        | 3.0                                 | 22.8                | 29.6        |
| (ii)                | -0.32                              | <b>40</b>     | 10         | 160                        | 3.0                                 | 27.7                | 24.2        |
| (ii)                | -0.32                              | <b>50</b>     | 10         | 160                        | 3.0                                 | 21.0                | 33.1        |
| (ii)                | -0.32                              | <b>60</b>     | 10         | 160                        | 3.0                                 | 21.2                | 38.8        |
| (iii)               | -0.32                              | 40            | <b>5.0</b> | 160                        | 3.0                                 | 14.5                | 31.5        |
| (iii)               | -0.32                              | 40            | <b>7.0</b> | 160                        | 3.0                                 | 9.16                | 23.3        |
| (iii)               | -0.32                              | 40            | <b>8.5</b> | 160                        | 3.0                                 | 13.3                | 14.6        |
| (iii)               | -0.32                              | 40            | <b>10</b>  | 160                        | 3.0                                 | 27.7                | 24.2        |
| (iv)                | -0.32                              | 40            | 10         | <b>40</b>                  | 3.0                                 | 21.4                | 45.0        |
| (iv)                | -0.32                              | 40            | 10         | <b>80</b>                  | 3.0                                 | 25.5                | 30.6        |
| (iv)                | -0.32                              | 40            | 10         | <b>160</b>                 | 3.0                                 | 27.7                | 24.2        |
| (iv)                | -0.32                              | 40            | 10         | <b>640</b>                 | 3.0                                 | 13.1                | 18.2        |
| (v)                 | -0.32                              | 40            | 10         | 160                        | <b>0.75</b>                         | 13.4                | 21.0        |
| (v)                 | -0.32                              | 40            | 10         | 160                        | <b>1.5</b>                          | 16.8                | 27.6        |
| (v)                 | -0.32                              | 40            | 10         | 160                        | <b>3.0</b>                          | 27.7                | 24.2        |
| (v)                 | -0.32                              | 40            | 10         | 160                        | <b>6.0</b>                          | 28.7                | 19.3        |

**Table S2** Electrochemical reduction of pyruvic acid at various (i) potentials, (ii) NH<sub>2</sub>OH amounts, (iii) pyruvic acid concentrations, (iv) pH values, and (v) temperatures.

| Reaction conditions |                         |                                                       |                            |             |               | FE (%) for products |             |
|---------------------|-------------------------|-------------------------------------------------------|----------------------------|-------------|---------------|---------------------|-------------|
|                     | Potential<br>(V vs RHE) | NH <sub>2</sub> OH amount<br>(equiv. to pyruvic acid) | Pyruvic acid<br>conc. (mM) | pH          | Temp.<br>(C°) | alanine             | lactic acid |
| (i)                 | <b>-0.4</b>             | 1.0                                                   | 160                        | 0.53        | 25            | 78.0                | —           |
| (i)                 | <b>-0.5</b>             | 1.0                                                   | 160                        | 0.53        | 25            | 84.5                | —           |
| (i)                 | <b>-0.6</b>             | 1.0                                                   | 160                        | 0.53        | 25            | 80.6                | —           |
| (ii)                | -0.5                    | <b>1.0</b>                                            | 160                        | 0.53        | 25            | 84.5                | —           |
| (ii)                | -0.5                    | <b>1.2</b>                                            | 160                        | 0.53        | 25            | 87.8                | —           |
| (ii)                | -0.5                    | <b>1.5</b>                                            | 160                        | 0.53        | 25            | 62.6                | —           |
| (ii)                | -0.5                    | <b>2.0</b>                                            | 160                        | 0.53        | 25            | 44.7                | —           |
| (iii)               | -0.5                    | 1.2                                                   | <b>80</b>                  | 0.53        | 25            | 74.3                | —           |
| (iii)               | -0.5                    | 1.2                                                   | <b>160</b>                 | 0.53        | 25            | 87.8                | —           |
| (iii)               | -0.5                    | 1.2                                                   | <b>540</b>                 | 0.53        | 25            | 78.0                | —           |
| (iv)                | -0.4                    | 1.2                                                   | 160                        | <b>0.19</b> | 25            | 81.0                | —           |
| (iv)                | -0.4                    | 1.2                                                   | 160                        | <b>0.53</b> | 25            | 78.0                | —           |
| (iv)                | -0.4                    | 1.2                                                   | 160                        | <b>1.23</b> | 25            | 57.7                | —           |
| (iv)                | -0.4                    | 1.2                                                   | 160                        | <b>3</b>    | 25            | 32.7                | —           |
| (v)                 | -0.5                    | 1.2                                                   | 160                        | 0.19        | <b>0</b>      | 99.5                | —           |
| (v)                 | -0.5                    | 1.2                                                   | 160                        | 0.19        | <b>25</b>     | 88.5                | —           |
| (v)                 | -0.5                    | 1.2                                                   | 160                        | 0.19        | <b>40</b>     | 69.9                | 20.6        |
| (v)                 | -0.5                    | 1.2                                                   | 160                        | 0.19        | <b>60</b>     | 45.5                | 21.8        |

**Table S3** Electrosynthesis of various amino acids from corresponding  $\alpha$ -keto acids and  $\text{NH}_2\text{OH}$ . The following conditions are identical for all the electrochemical reactions; 1.2 equiv. to  $\alpha$ -keto acid for  $\text{NH}_2\text{OH}$  amount, 0 °C of reaction temperature, pH = 0.19. Every experiment was conducted 3 times, and averages and errors were calculated for the obtained FE values.

| Reaction conditions                        |                  |               |                                                        | Products      |                                                                         |                      |
|--------------------------------------------|------------------|---------------|--------------------------------------------------------|---------------|-------------------------------------------------------------------------|----------------------|
| $\alpha$ -Keto acids and its concentration | Potential vs RHE | Reaction time | Electrolyte                                            | Amino acid    | FE                                                                      | Ave. and error of FE |
| pyruvic acid<br>160 mM                     | − 0.5 V          | 2 h.          | 0.5 M $\text{H}_2\text{SO}_4$ aq.                      | alanine       | 1 <sup>st</sup> 99.5%<br>2 <sup>nd</sup> 98.9%<br>3 <sup>rd</sup> 100%  | 99.5±0.5%            |
| glyoxylic acid<br>160 mM                   | − 0.5 V          | 2 h.          | 0.5 M $\text{H}_2\text{SO}_4$ aq.                      | glycine       | 1 <sup>st</sup> 96.4%<br>2 <sup>nd</sup> 97.9%<br>3 <sup>rd</sup> 99.2% | 97.8±1.4%            |
| oxaloacetic acid<br>160 mM                 | − 0.5 V          | 2 h.          | 0.5 M $\text{H}_2\text{SO}_4$ aq.                      | aspartic acid | 1 <sup>st</sup> 95.8%<br>2 <sup>nd</sup> 98.1%<br>3 <sup>rd</sup> 95.5% | 96.5±1.4%            |
| $\alpha$ -ketoglutaric acid<br>160 mM      | − 0.5 V          | 2 h.          | 0.5 M $\text{H}_2\text{SO}_4$ aq.                      | glutamic acid | 1 <sup>st</sup> 95.4%<br>2 <sup>nd</sup> 96.5%<br>3 <sup>rd</sup> 98.2% | 96.7±1.4%            |
| 4-methyl-2-oxovaleric acid<br>80 mM        | − 0.5 V          | 2 h.          | 0.5 M $\text{H}_2\text{SO}_4$ aq.                      | leucine       | 1 <sup>st</sup> 90.7%<br>2 <sup>nd</sup> 88.7%<br>3 <sup>rd</sup> 92.7% | 90.7±2.0%            |
| phenylpyruvic acid<br>20 mM                | − 0.6 V          | 5 h.          | 0.5 M $\text{H}_2\text{SO}_4$ aq.<br>contains 33% DMSO | phenylalanine | 1 <sup>st</sup> 87.0%<br>2 <sup>nd</sup> 86.3%<br>3 <sup>rd</sup> 87.7% | 87.0±0.7%            |
| 4-hydroxyphenylpyruvic acid<br>30 mM       | − 0.6 V          | 5 h.          | 0.5 M $\text{H}_2\text{SO}_4$ aq.<br>contains 25% DMSO | tyrosine      | 1 <sup>st</sup> 75.3%<br>2 <sup>nd</sup> 77.0%<br>3 <sup>rd</sup> 78.5% | 77.0±1.6%            |



**Table S4** Comparison of the reaction conditions and FE values for amino acid electrosynthesis

| Reaction conditions          |                           |                                                                   | Amino acids and FE (%) |       | References    |
|------------------------------|---------------------------|-------------------------------------------------------------------|------------------------|-------|---------------|
| $\alpha$ -Keto acids         | Electrodes                | Nitrogen sources                                                  |                        |       |               |
| pyruvic acid                 | TiO <sub>2</sub> /Ti mesh | (NH <sub>2</sub> OH) <sub>2</sub> ·H <sub>2</sub> SO <sub>4</sub> | alanine                | 99    | This work     |
| glyoxylic acid               | TiO <sub>2</sub> /Ti mesh | (NH <sub>2</sub> OH) <sub>2</sub> ·H <sub>2</sub> SO <sub>4</sub> | glycine                | 96    | This work     |
| oxaloacetic acid             | TiO <sub>2</sub> /Ti mesh | (NH <sub>2</sub> OH) <sub>2</sub> ·H <sub>2</sub> SO <sub>4</sub> | aspartic acid          | 96    | This work     |
| $\alpha$ -ketoglutaric acid  | TiO <sub>2</sub> /Ti mesh | (NH <sub>2</sub> OH) <sub>2</sub> ·H <sub>2</sub> SO <sub>4</sub> | glutamic acid          | 95    | This work     |
| 4-methyl-2-oxovaleric acid   | TiO <sub>2</sub> /Ti mesh | (NH <sub>2</sub> OH) <sub>2</sub> ·H <sub>2</sub> SO <sub>4</sub> | leucine                | 91    | This work     |
| phenylpyruvic acid           | TiO <sub>2</sub> /Ti mesh | (NH <sub>2</sub> OH) <sub>2</sub> ·H <sub>2</sub> SO <sub>4</sub> | phenylalanine          | 87    | This work     |
| 4-hydroxyphenyl-pyruvic acid | TiO <sub>2</sub> /Ti mesh | (NH <sub>2</sub> OH) <sub>2</sub> ·H <sub>2</sub> SO <sub>4</sub> | tyrosine               | 75    | This work     |
| pyruvic acid                 | Hg                        | NH <sub>3</sub> /NH <sub>4</sub> Cl                               | alanine                | 58    | <sup>27</sup> |
| $\alpha$ -ketoglutaric acid  | Hg                        | NH <sub>3</sub> /NH <sub>4</sub> Cl                               | glutamic acid          | 63    | <sup>27</sup> |
| pyruvic acid                 | Pt black                  | NH <sub>3</sub> /NH <sub>4</sub> Cl                               | alanine                | 64    | <sup>28</sup> |
| $\alpha$ -ketoglutaric acid  | Pt black                  | NH <sub>3</sub> /NH <sub>4</sub> Cl                               | glutamic acid          | 83    | <sup>28</sup> |
| $\alpha$ -ketoglutaric acid  | Hg                        | NH <sub>3</sub> /(NH <sub>4</sub> ) <sub>2</sub> SO <sub>4</sub>  | glutamic acid          | — [1] | <sup>29</sup> |
| 4-methyl-2-oxovaleric acid   | carbon felt               | NH <sub>3</sub> /(NH <sub>4</sub> ) <sub>2</sub> SO <sub>4</sub>  | leucine                | — [1] | <sup>30</sup> |
| oxalic acid <sup>[2]</sup>   | Pb                        | (NH <sub>2</sub> OH) <sub>2</sub> ·H <sub>2</sub> SO <sub>4</sub> | glycine                | — [1] | <sup>31</sup> |

[1] Not reported, [2] Not  $\alpha$ -keto acid

$^1\text{H}$  NMR spectrum of the reaction solution diluted 5 times with  $\text{D}_2\text{O}$

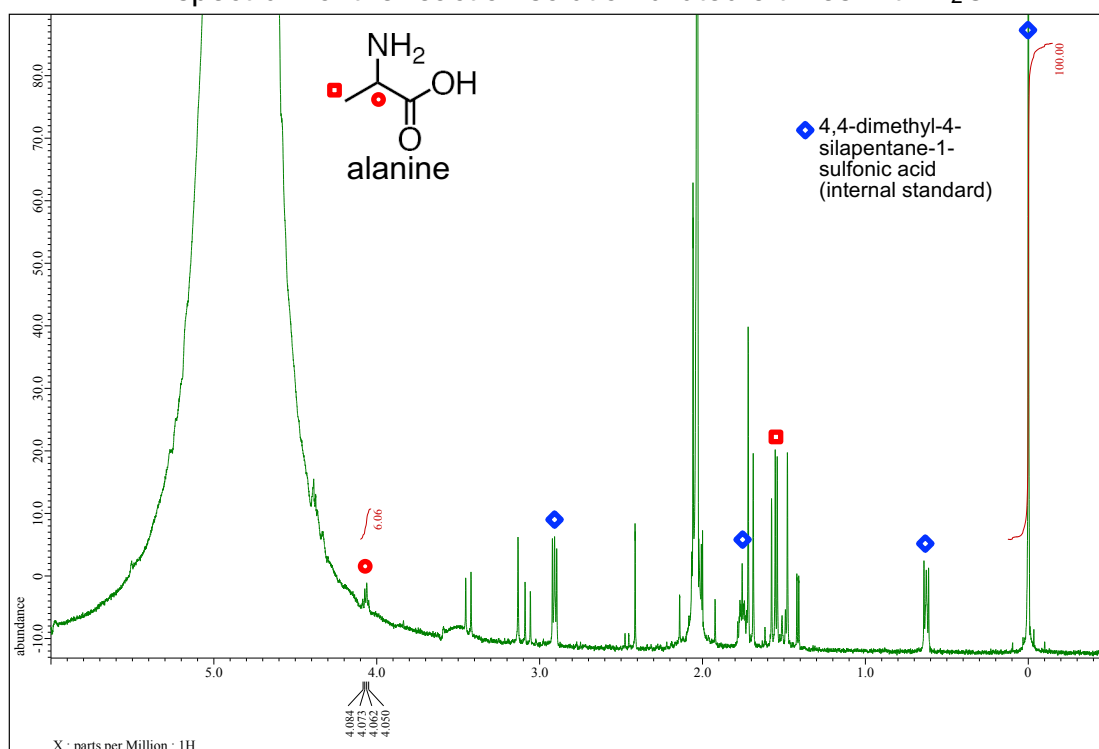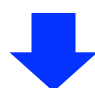

Addition of approximately 10 mM commercial alanine

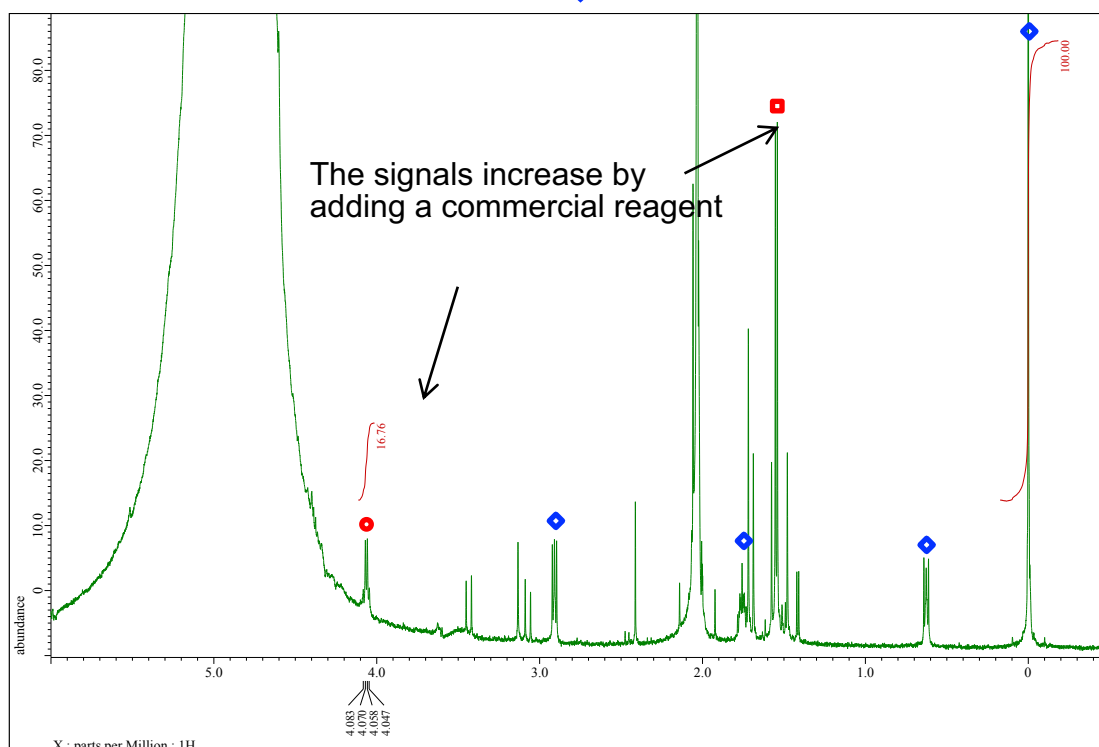

$^1\text{H}$  NMR spectrum of the reaction solution diluted 5 times with  $\text{D}_2\text{O}$

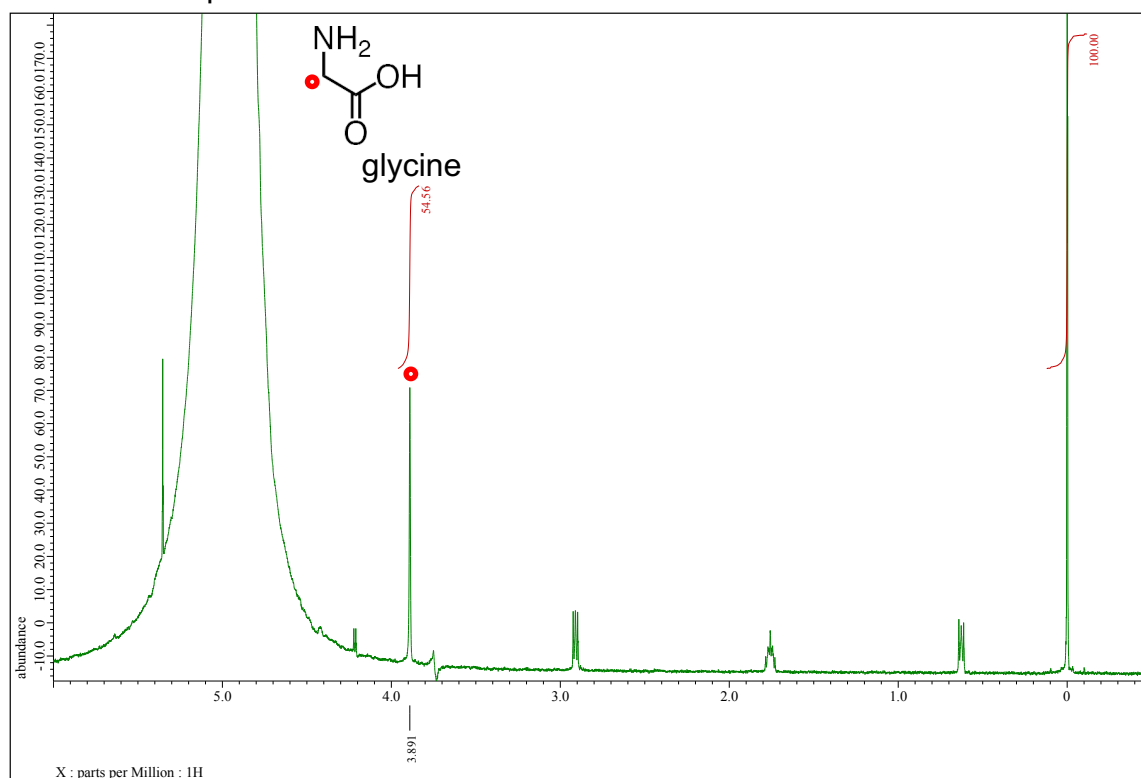

$^1\text{H}$  NMR spectrum with additional commercial glycine was not measured.

$^1\text{H}$  NMR spectrum of the reaction solution diluted 5 times with  $\text{D}_2\text{O}$

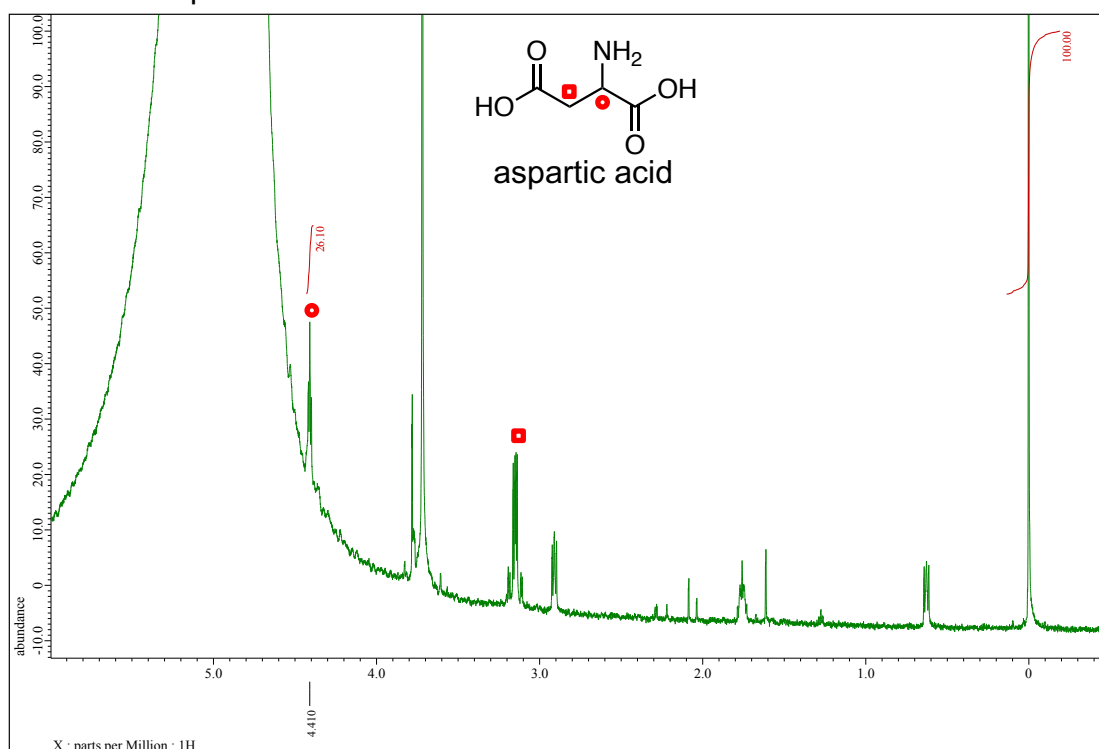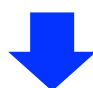

Addition of approximately  
10 mM commercial aspartic acid

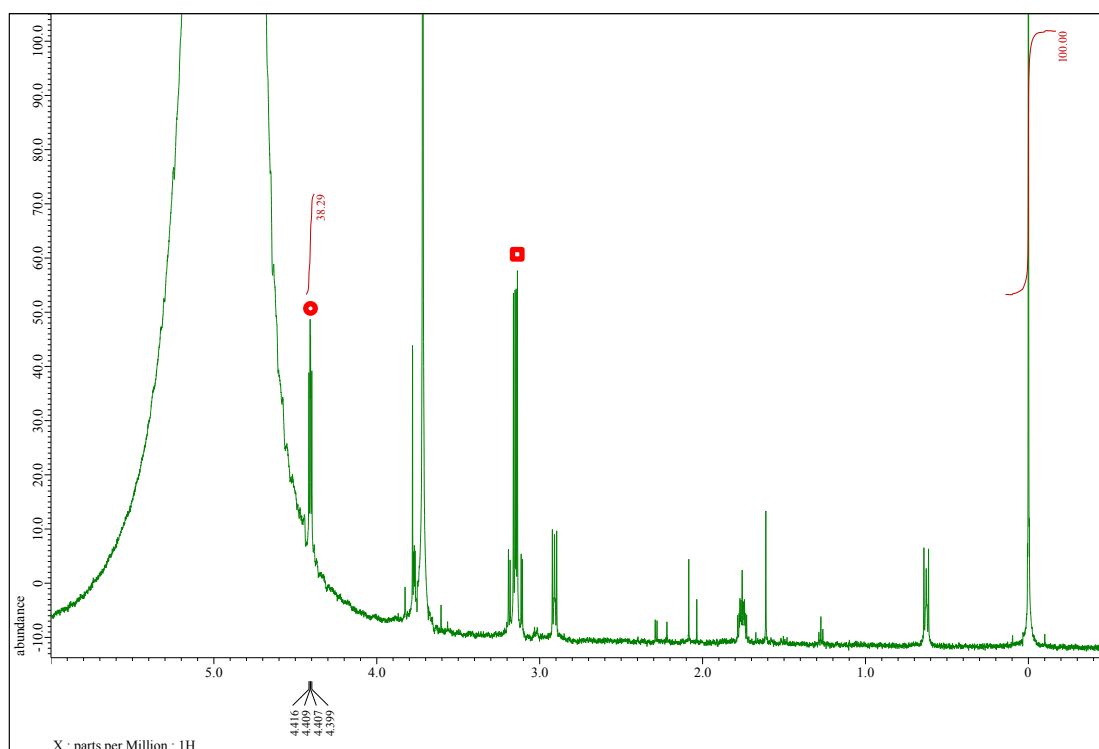

$^1\text{H}$  NMR spectrum of the reaction solution diluted 5 times with  $\text{D}_2\text{O}$

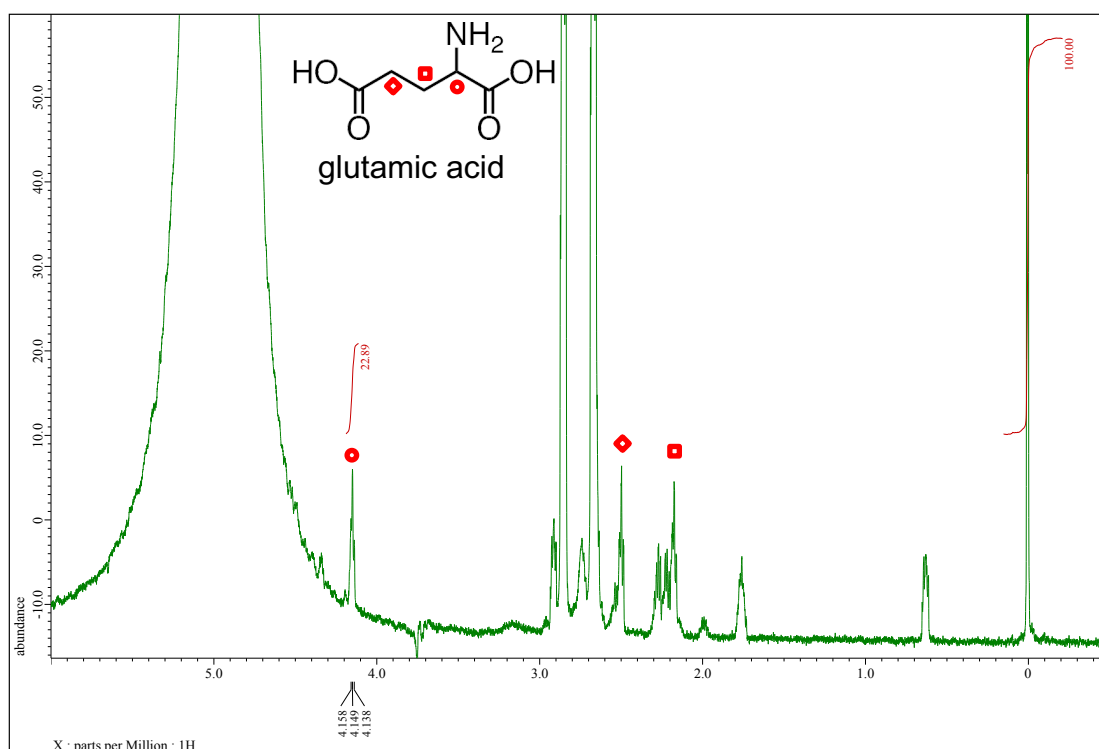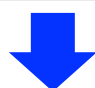

Addition of approximately 10 mM commercial glutamic acid

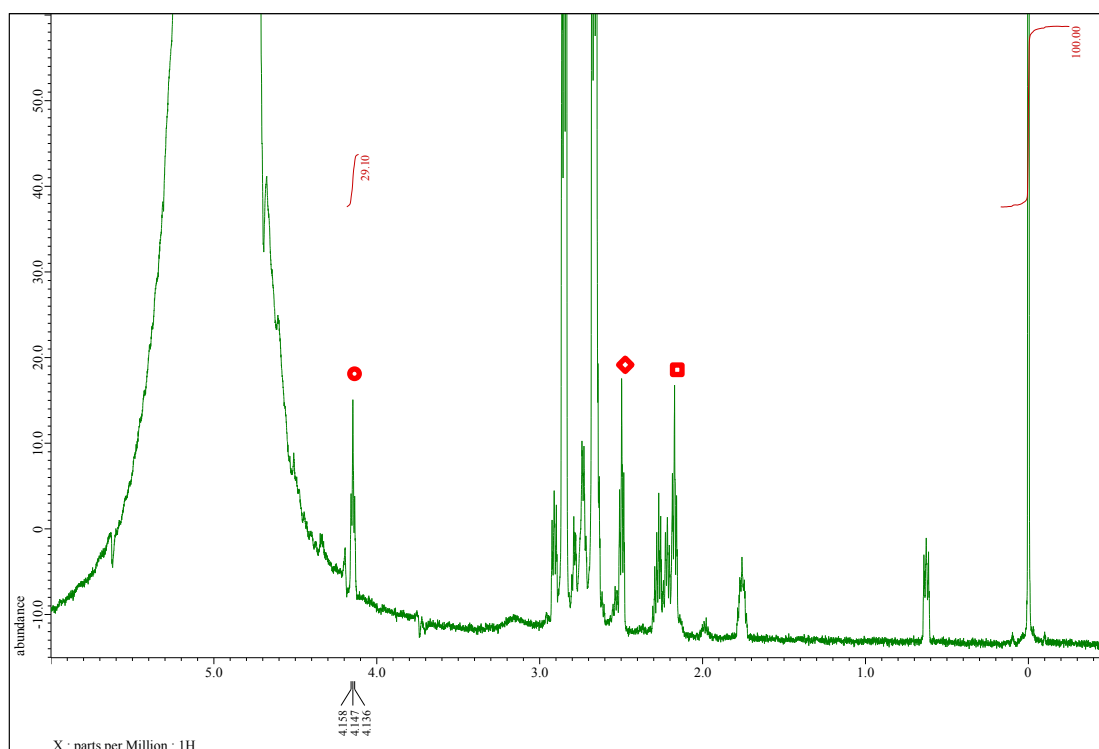

$^1\text{H}$  NMR spectrum of the reaction solution diluted 5 times with  $\text{D}_2\text{O}$

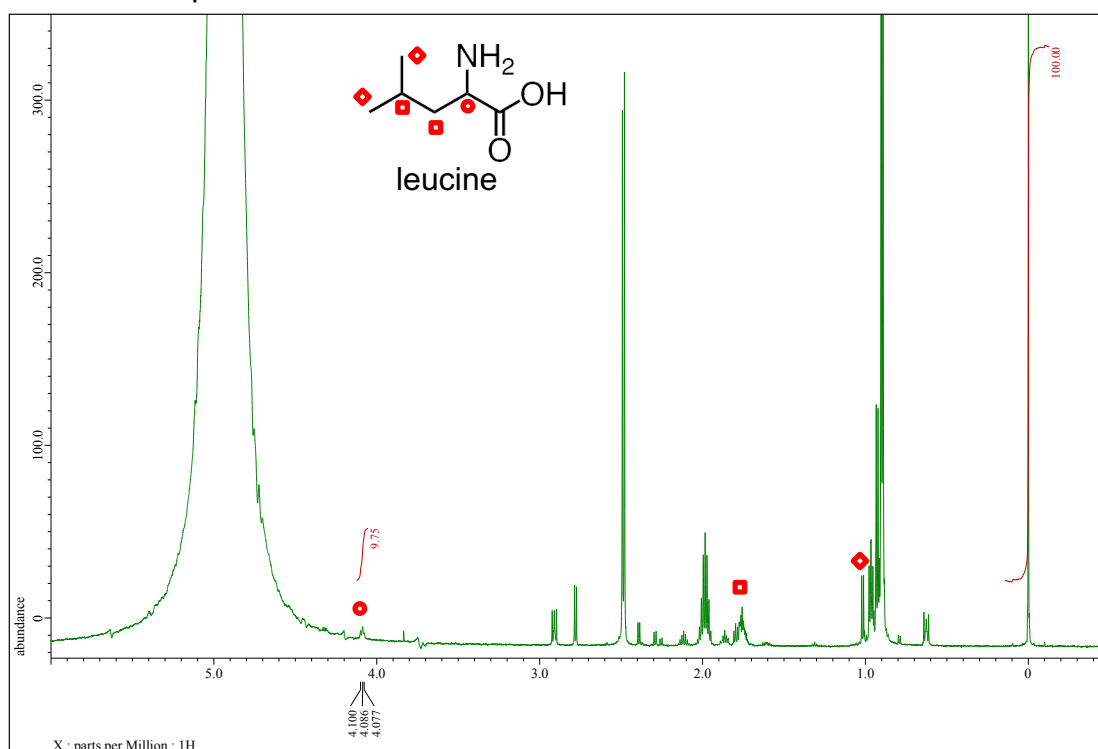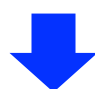

Addition of approximately  
10 mM commercial leucine

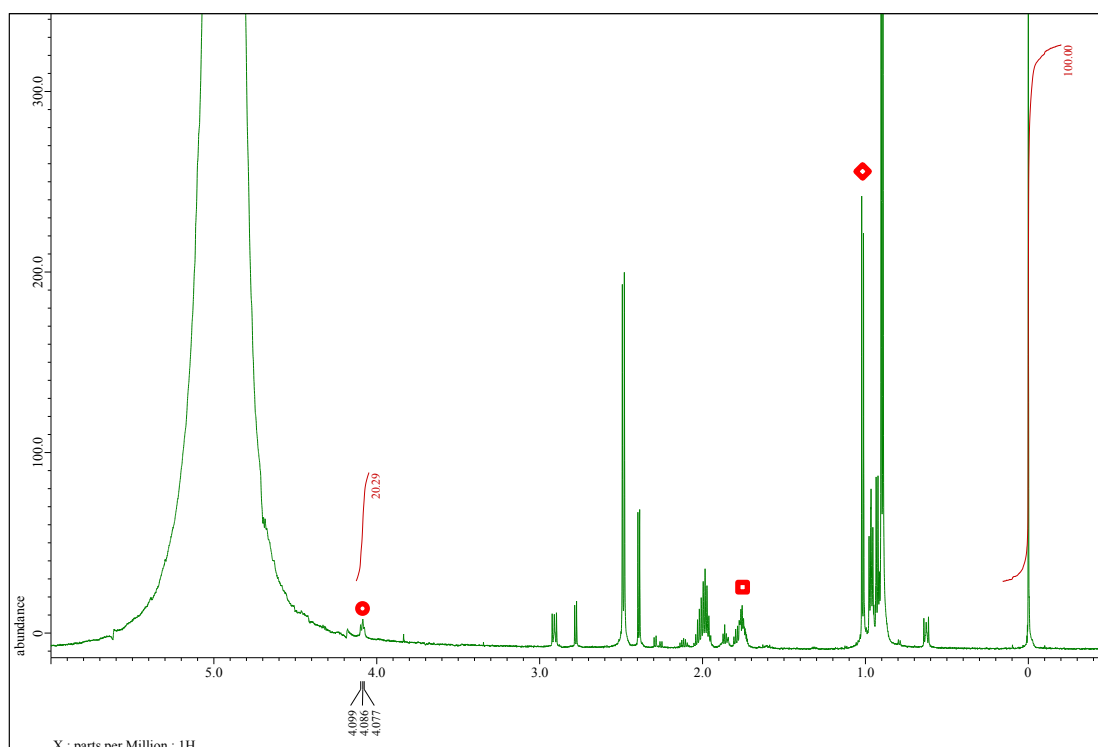

$^1\text{H}$  NMR spectrum of the reaction solution diluted 5 times with  $\text{D}_2\text{O}$

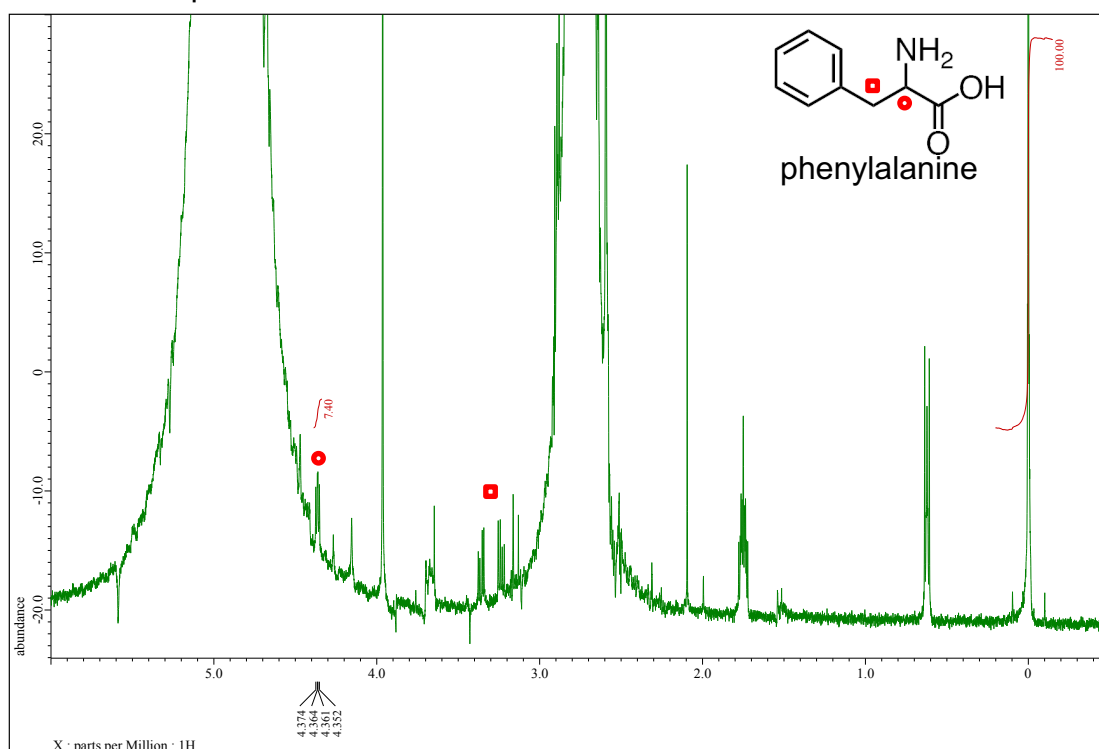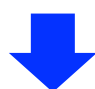

Addition of approximately 5 mM commercial phenylalanine

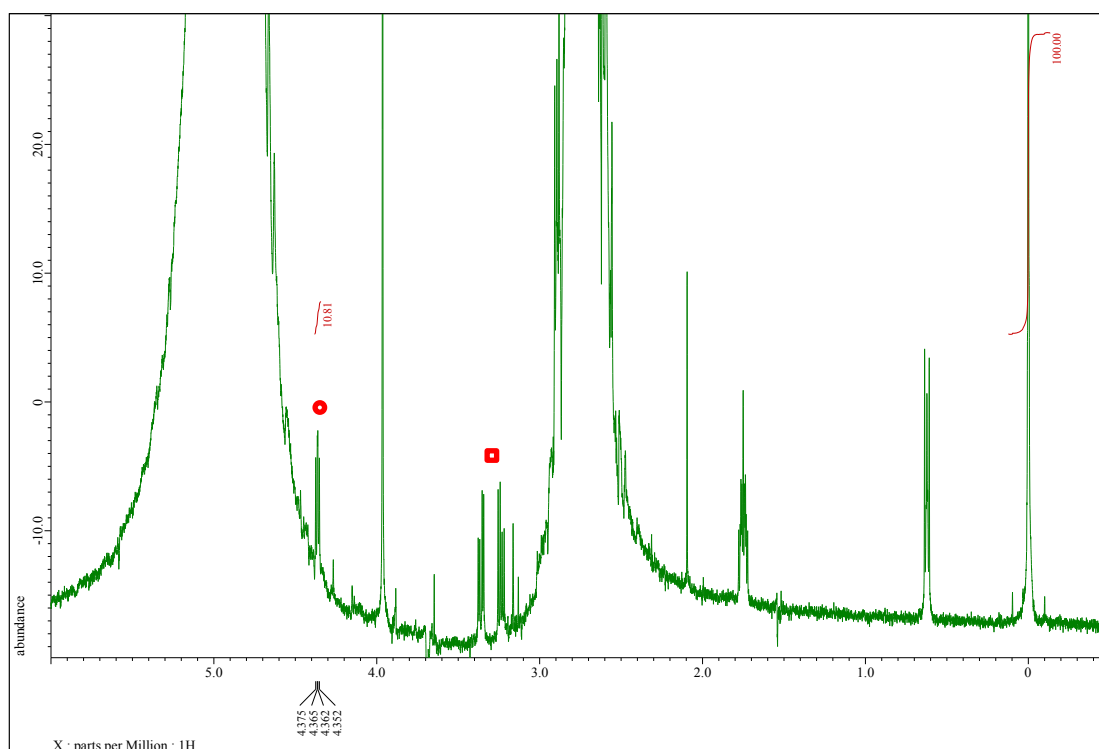

$^1\text{H}$  NMR spectrum of the reaction solution diluted 5 times with  $\text{D}_2\text{O}$

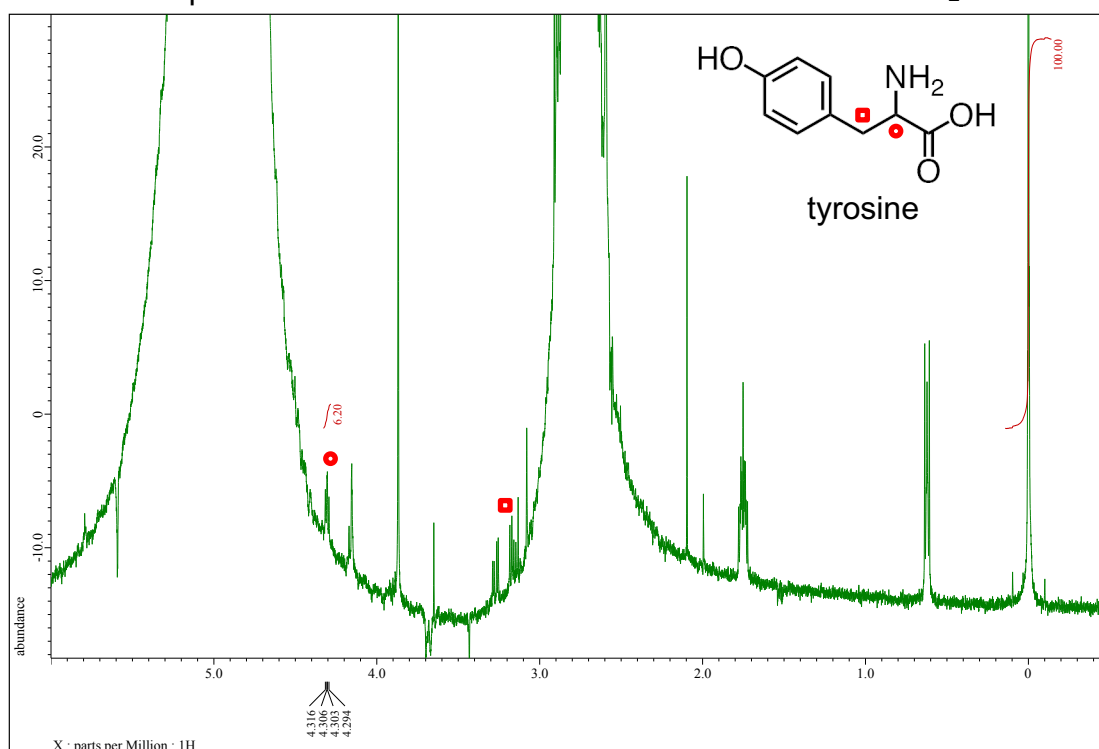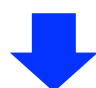

Addition of approximately 5 mM commercial tyrosine

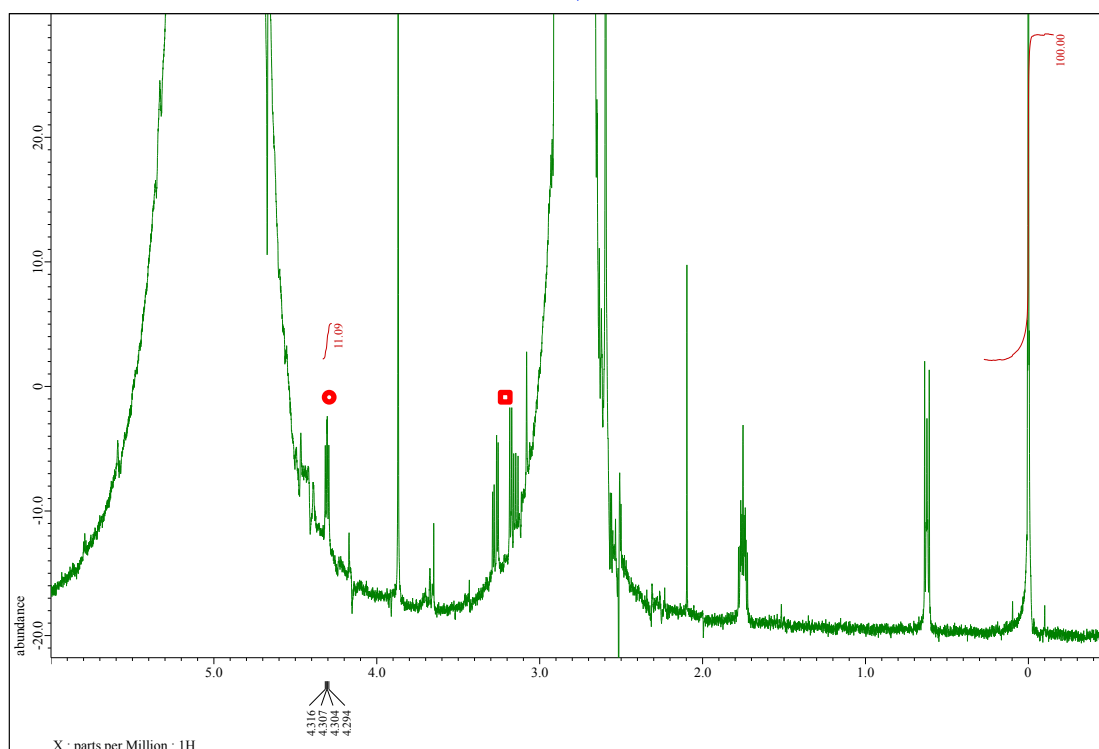



## References

1. M. Sadakiyo, S. Hata, X. D. Cui and M. Yamauchi, *Sci. Rep.*, 2017, **7** 17032.
2. J. C. Cruz, V. Baglio, S. Siracusano, R. Ornelas, L. Ortiz-Frade, L. G. Arriaga, V. Antonucci and A. S. Arico, *J. Nanoparticle Res*, 2011, **13**, 1639.
3. T. Fukushima, M. Higashi, S. Kitano, T. Sugiyama and M. Yamauchi, *Catal. Today*, in press.
4. S. Ma, R. Luo, S. Moniri, Y. C. Lan and P. J. A. Kenis, *J. Electrochem. Soc.*, 2014, **161**, F1124.
5. S. Verma, X. Lu, S. C. Ma, R. I. Masel and P. J. A. Kenis, *Phys. Chem. Chem. Phys.*, 2016, **18**, 7075.
6. A. Subash, V. S. Malik, S. S. Shafi and S. S. Mansoor, *Pharma Chem.*, 2015, **7**, 299.
7. A. Garcia-Raso, P. M. Deya and J. M. Saa, *J. Org. Chem.*, 1986, **51**, 4285.
8. W. Deng, P. Wang, B. Wang, Y. Wang, L. Yan, Y. Li, Q. Zhang, Z. Cao and Y. Wang, *Green Chem.*, 2018, **20**, 735.
9. X. Lei, F.-F. Wang, C.-L. Liu, R.-Z. Yang and W.-S. Dong, *Appl. Catal., A*, 2014, **482**, 78.
10. C. Guarin, L. Gavila, M. Constanti and F. Medina, *Chem. Eng. Sci.*, 2018, **179**, 83.
11. F.-W. Wang, Z.-B. Huo, Y.-Q. Wang and F.-M. Jin, *Res. Chem. Intermed.*, 2011, **37**, 487.
12. L. Kong, G. Li, H. Wang, W. He and F. Ling, *J. Chem. Technol. Biotechnol.*, 2008, **83**, 383.
13. F. F. Wang, C. L. Liu and W. S. Dong, *Green Chem.*, 2013, **15**, 2091.
14. X. Yang, L. Yang, W. Fan and H. Lin, *Catal. Today*, 2016, **269**, 56.
15. Y. Wang, W. Deng, B. Wang, Q. Zhang, X. Wan, Z. Tang, Y. Wang, C. Zhu, Z. Cao, G. Wang and H. Wan, *Nat. Commun.*, 2013, **4**, 2141.
16. J. Zhang, X. Liu, M. Sun, X. Ma and Y. Han, *ACS Catal.*, 2012, **2**, 1698.
17. Y. Chen, X. Ren and Q. Wei, *Bioresour. Technol.*, 2017, **228**, 47.
18. E. Sjostrom, *Biomass Bioenergy*, 1991, **1**, 61.
19. Z. W. Jiang, Z. R. Zhang, J. L. Song, Q. L. Meng, H. C. Zhou, Z. H. He and B. X. Han, *ACS Sustainable Chem. Eng.*, 2016, **4**, 305.
20. I. Gimenez, S. Maximovitch, M. J. Barbier, Y. Christidis and G. Mattioda, *New J. Chem.*, 1987, **11**, 733.
21. K. Scott, *Chem. Eng. Res. Des.*, 1986, **64**, 266.
22. J. Tafel and G. Friedrichs, *Ber. Dtsch. Chem. Ges.*, 1904, **37**, 3187.
23. S. I. Mussatto, G. Dragone and I. C. Roberto, *Ind. Crops Prod.*, 2007, **25**, 231.
24. R.-C. Sun, X.-F. Sun and S.-H. Zhang, *J. Agric. Food Chem.*, 2001, **49**, 5122.
25. Y. Izumi, *Catal. Today*, 1997, **33**, 371.
26. V. J. Nowlan and T. T. Tidwell, *Acc. Chem. Res.*, 1977, **10**, 252.
27. E. A. Jeffery and A. Meisters, *Aust. J. Chem.*, 1978, **31**, 73.
28. E. A. Jeffery, O. Johansen and A. Meisters, *Aust. J. Chem.*, 1978, **31**, 79.
29. A. Anne, S. Daninos, J. Moiroux and C. Bourdillon, *New J. Chem.*, 1994, **18**, 1169.
30. W. Markle and S. Lutz, *Electrochim. Acta*, 2008, **53**, 3175.
31. S. Yamamoto, T. Nobukuni, M. Matsuda, JP Patent 1958-001867.
